# Supplementary material for: Elucidation of Hepatitis C Virus Transmission and Early Diversification by Single Genome Sequencing
Source: PLOS journal article supplement (doi:10.1371/journal.ppat.1002880), 2012-08-23
Supplement: S4 (10.1371/journal.ppat.1002880.s004) [file journal.ppat.1002880.s004]

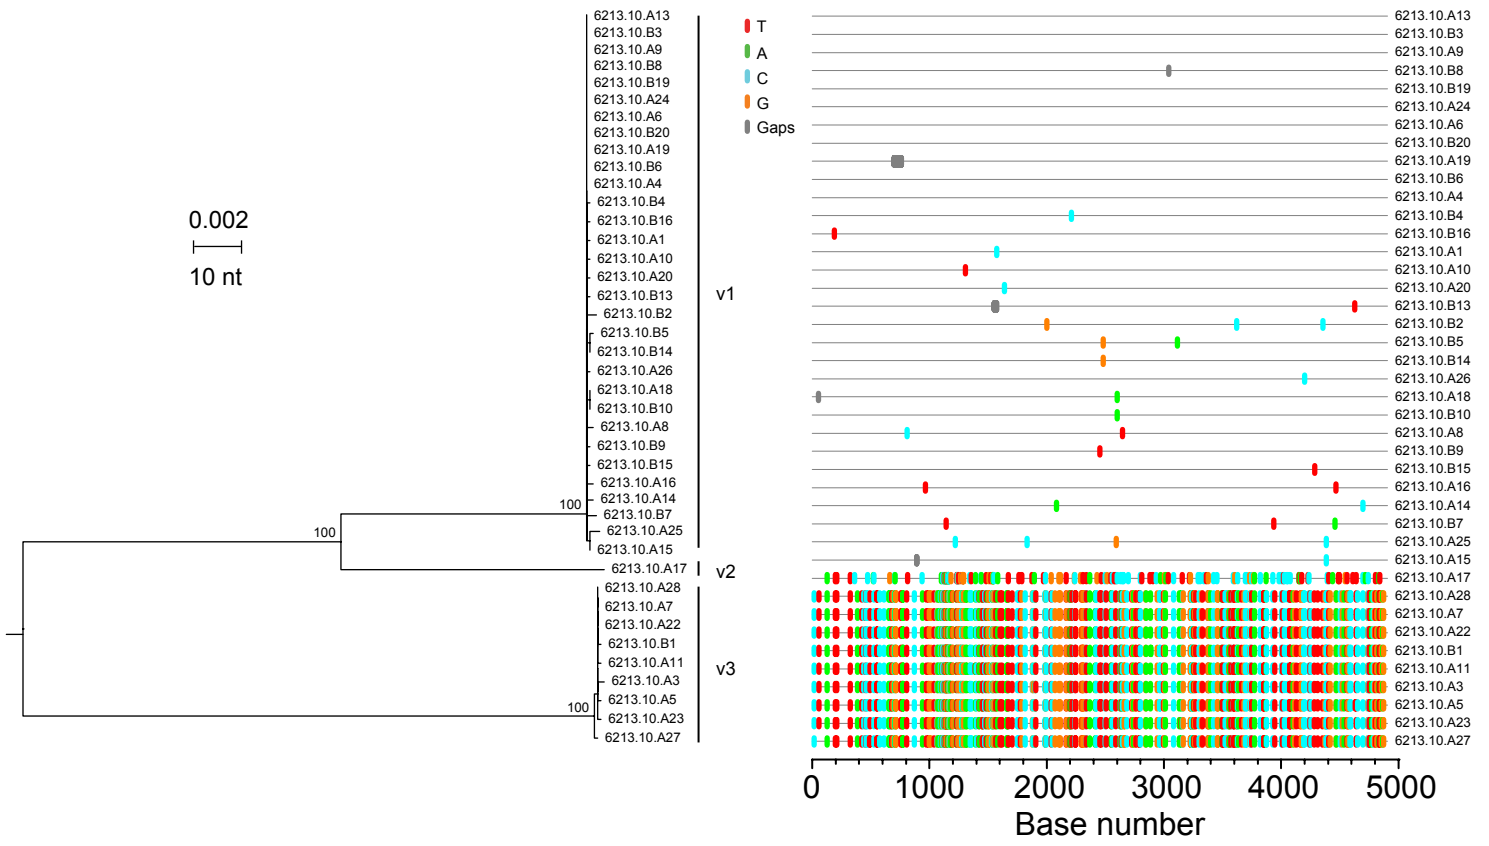

Figure S4
